# Supplementary material for: Expanded K0.37Fe0.04Al0.07Mn0.89O2 Layered Material as a High-Performance Cathode in Sodium-Ion Batteries
Source: MDPI journal article supplement (doi:10.3390/en15155659), 2022-08-04
Supplement: s1 [file s1]

Archive with 1 entries (1 files):
- energies-1711646-supplementary.pdf
