# Supplementary material for: Expanded K0.37Fe0.04Al0.07Mn0.89O2 Layered Material as a High-Performance Cathode in Sodium-Ion Batteries
Source: MDPI journal article supplement (doi:10.3390/en15155659), 2022-08-04
Supplement: s1 [file s1 › energies-1711646-supplementary.pdf]

## Supporting information

# Expanded $\text{K}_{0.37}\text{Fe}_{0.04}\text{Al}_{0.07}\text{Mn}_{0.89}\text{O}_2$ Layered Material as a High-Performance Cathode in Sodium-Ion Batteries

Pan Ning <sup>1</sup>, Xinbin Mao <sup>1</sup>, Li Zhou <sup>1</sup>, Hongrui Wang <sup>2</sup>, Feng Zhang <sup>2</sup>, Congshan Zhou <sup>1,\*</sup>, Bei Long <sup>3,\*</sup>, Yuping Wu <sup>4</sup> and Xiongwei Wu <sup>2,\*</sup>

<sup>1</sup> College of Chemistry and Chemical Engineering, Hunan Institute of Science and Technology, Yueyang 414006, China

<sup>2</sup> School of Chemistry and Materials Science, Hunan Agricultural University, Changsha 410128, China

<sup>3</sup> School of Chemistry, Xiangtan University, Xiangtan 411105, China

<sup>4</sup> School of Energy and Environment, Southeast University, Nanjing 211189, China

\* Correspondence: zhoucongs@outlook.com (C.Z.); longbei@xtu.edu.cn (B.L.); wxw@hunau.edu.cn (X.W.)

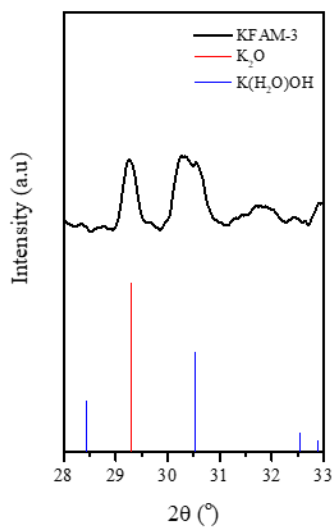

**Figure S1.** XRD pattern of KFAM-3.

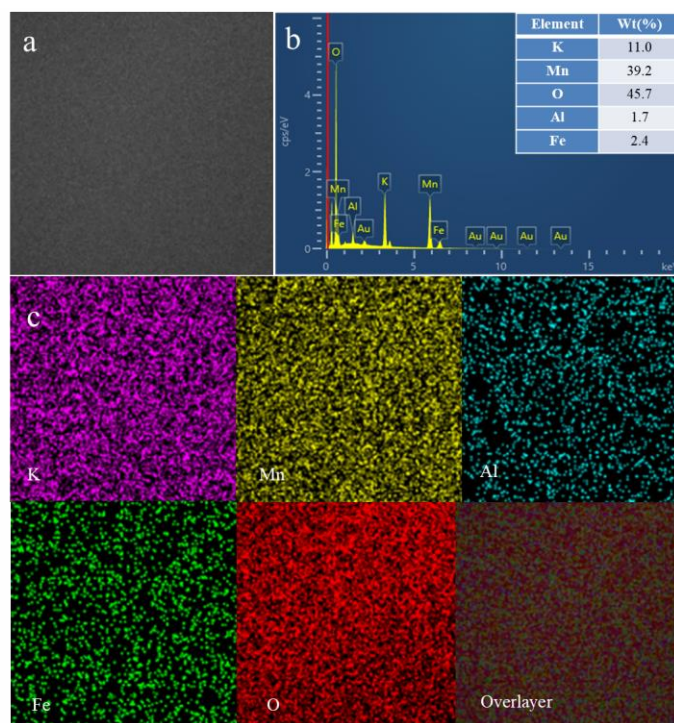

**Figure S2.** (a) ADF image, (b) EDX spectrum and (c) elemental mapping of KFAM-1.

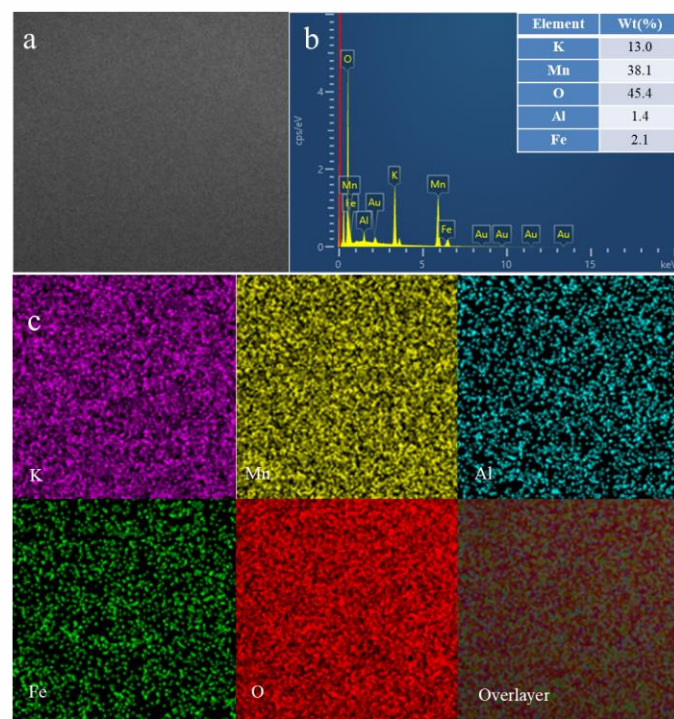

**Figure S3.** (a) ADF image, (b) EDX spectrum and (c) elemental mapping of KFAM-3.

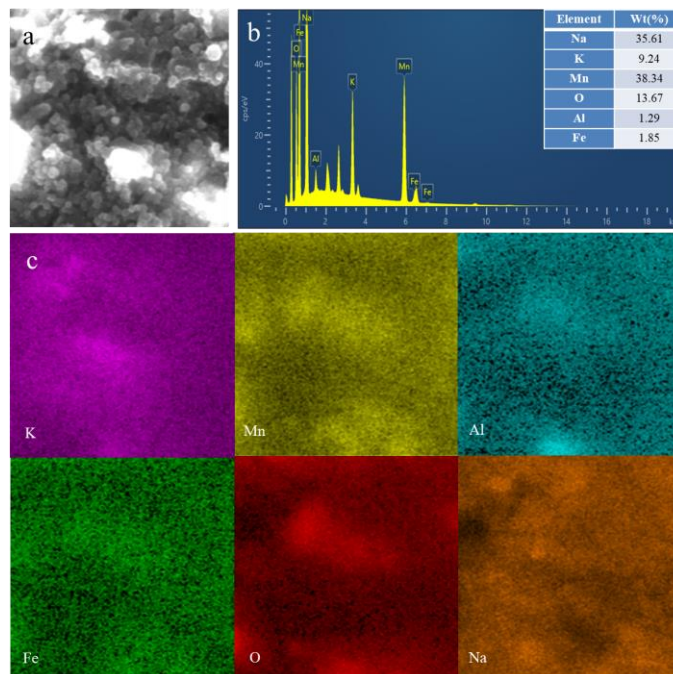

**Figure S4.** (a) ADF image, (b) EDX spectrum and (c) elemental mapping of KFAM-1 after cycling.

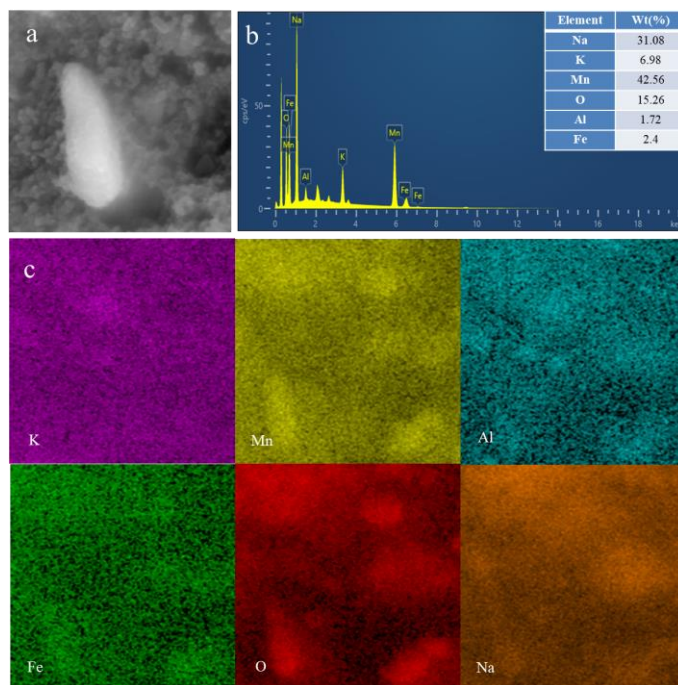

**Figure S5.** (a) ADF image, (b) EDX spectrum and (c) elemental mapping of KFAM-2 after cycling.

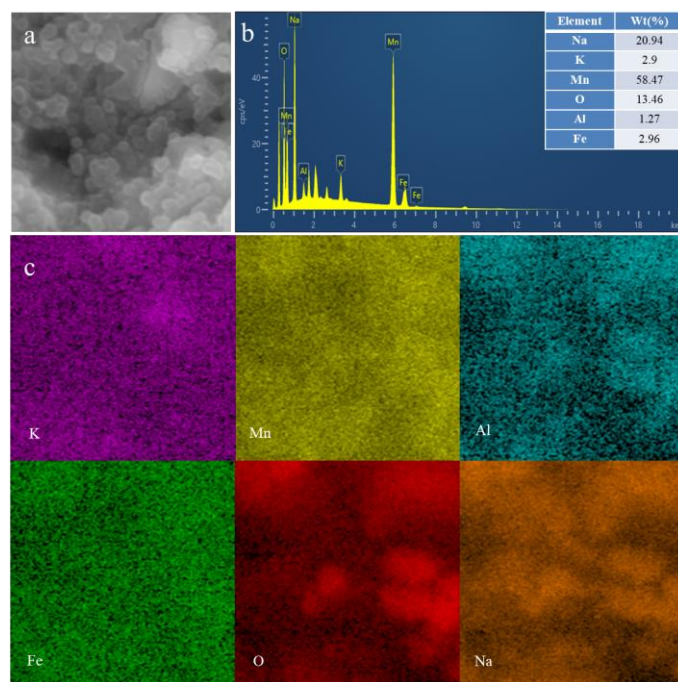

**Figure S6.** (a) ADF image, (b) EDX spectrum and (c) elemental mapping of KFAM-3 after cycling.

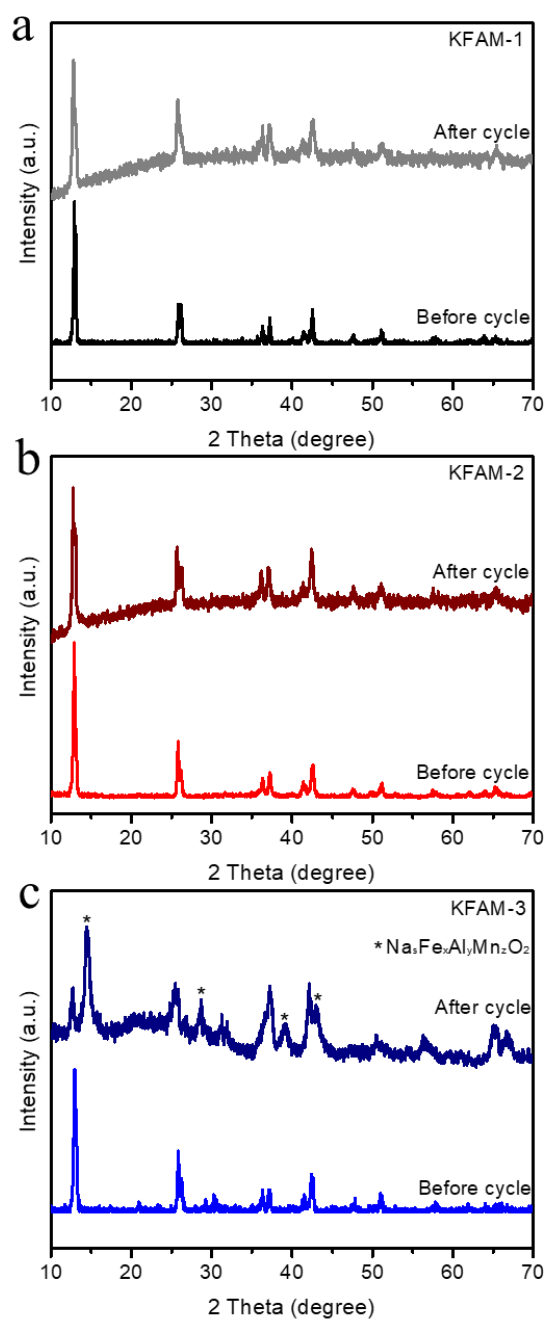

**Figure S7.** XRD patterns of (a) KFAM-1, (b) KFAM-2 and (c) KFAM-3 before and after cycle.
